# Supplementary material
Source: PubMed Central journal article supplement (PMC5853594)
Supplement: jix648_suppl_supplementary_data.pdf [file jix648_suppl_supplementary_data.pdf]

## **Supplementary data.**

Table S1. Transcripts induced by SLR14 in nasal epithelial cells.

Table S2: Patients with evidence of co-infection or non-viral infection, study #1

Fig S1. Patient characteristics, mRNA biomarker study of 68 nasopharyngeal swabs (study 1)

Fig S2. ROC curves showing predictive value of individual ISG mRNA levels for detection of a respiratory virus in 68 NP swabs (study 1)

Fig S3. Patient age distribution, 151 NP swabs, study 2.

Fig S4. Relationship between concentration of CXCL10 or CXCL11 and Ct value at which RT-qPCR for rhinovirus became positive (study 2)

Fig S5. Correlation between [CXCL11] and [CXCL10], 219 NP swabs (study 1+ study 2).

Fig S6. ROC curves showing correlation between [CXCL11] or [CXCL10] (pg/ml) in NP swab transport medium and detection of respiratory virus in 219 NP swabs (study 1 + study 2; see Fig 5.)

**Table S1: Top 50 transcripts induced by SLR14 in nasal epithelial cells**

#grey shading indicates mRNA encoding secreted protein  
 bold type indicates biomarker assessed in this study

|    |                        | Name                      | Log2FoldChange     | p-adj              |
|----|------------------------|---------------------------|--------------------|--------------------|
| 1  | ENSG00000119917        | IFIT3                     | 8.611393418        | 8.0924E-287        |
| 2  | <b>ENSG00000119922</b> | <b>IFIT2</b>              | <b>8.590190005</b> | <b>6.6884E-275</b> |
| 3  | ENSG00000185745        | IFIT1                     | 8.546567665        | 4.4263E-270        |
| 4  | <b>ENSG00000135114</b> | <b>OASL</b>               | <b>6.572461394</b> | <b>1.3962E-193</b> |
| 5  | ENSG00000138646        | HERC5                     | 6.510793036        | 8.39773E-90        |
| 6  | ENSG00000157601        | MX1                       | 6.487847248        | 2.3677E-174        |
| 7  | <b>ENSG00000169245</b> | <b>CXCL10<sup>#</sup></b> | <b>6.318573752</b> | <b>3.54056E-87</b> |
| 8  | ENSG00000173110        | HSPA6                     | 6.071703284        | 1.54506E-98        |
| 9  | ENSG00000089127        | OAS1                      | 5.808443795        | 4.2228E-138        |
| 10 | ENSG00000137965        | IFI44                     | 5.742808112        | 1.2311E-112        |
| 11 | ENSG00000187608        | ISG15                     | 5.659229306        | 6.5815E-180        |
| 12 | <b>ENSG00000169248</b> | <b>CXCL11</b>             | <b>5.642394328</b> | <b>3.53198E-58</b> |
| 13 | ENSG00000111335        | OAS2                      | 5.632369276        | 3.0725E-143        |
| 14 | ENSG00000134326        | CMPK2                     | 5.581856338        | 7.73411E-60        |
| 15 | ENSG00000183486        | MX2                       | 5.282207919        | 6.94324E-54        |
| 16 | ENSG00000006210        | CX3CL1                    | 5.270156491        | 2.45627E-75        |
| 17 | ENSG00000161570        | NA                        | 5.109274183        | 1.30602E-62        |
| 18 | ENSG00000169429        | CXCL8                     | 4.771849114        | 4.65035E-65        |
| 19 | ENSG00000204389        | HSPA1A                    | 4.713080209        | 1.8264E-124        |
| 20 | ENSG00000107201        | DDX58                     | 4.666164824        | 7.5314E-102        |
| 21 | ENSG00000111331        | OAS3                      | 4.506616219        | 1.0547E-119        |
| 22 | ENSG00000138135        | CH25H                     | 4.505207533        | 1.11172E-32        |
| 23 | ENSG00000137959        | IFI44L                    | 4.288815032        | 4.09136E-31        |
| 24 | ENSG00000115267        | IFIH1                     | 4.276995899        | 3.8088E-124        |
| 25 | ENSG00000126709        | IFI6                      | 4.274630573        | 3.3313E-76         |
| 26 | ENSG00000137628        | DDX60                     | 4.201802303        | 3.55189E-71        |
| 27 | ENSG00000134321        | RSAD2                     | 4.18430399         | 2.72845E-26        |
| 28 | ENSG00000204388        | HSPA1B                    | 4.15467765         | 1.1595E-113        |
| 29 | ENSG00000182393        | IFNL1                     | 4.104481699        | 1.77067E-26        |
| 30 | ENSG00000177409        | SAMD9L                    | 3.936210162        | 7.31532E-40        |
| 31 | ENSG00000197279        | ZNF165                    | 3.912907427        | 3.65517E-77        |
| 32 | ENSG00000185885        | IFITM1                    | 3.840045518        | 8.65309E-35        |
| 33 | ENSG00000136688        | IL36G                     | 3.702192698        | 7.67828E-39        |
| 34 | ENSG00000130589        | HELZ2                     | 3.516215066        | 2.3625E-68         |
| 35 | ENSG00000163739        | CXCL1                     | 3.413686517        | 5.36081E-38        |

|    |                 |           |             |             |
|----|-----------------|-----------|-------------|-------------|
| 36 | ENSG00000132530 | XAF1      | 3.40555388  | 4.13208E-21 |
| 37 | ENSG00000011422 | PLAUR     | 3.391937461 | 5.47207E-64 |
| 38 | ENSG00000184979 | USP18     | 3.387705708 | 6.78695E-28 |
| 39 | ENSG00000219891 | ZSCAN12P1 | 3.303030038 | 6.82501E-31 |
| 40 | ENSG00000100342 | APOL1     | 3.238506383 | 2.62835E-36 |
| 41 | ENSG00000187479 | C11orf96  | 3.221151972 | 7.87187E-16 |
| 42 | ENSG00000112972 | HMGCS1    | 3.192285269 | 1.93618E-92 |
| 43 | ENSG00000225886 |           | 3.117579963 | 1.76263E-13 |
| 44 | ENSG00000167772 | ANGPTL4   | 3.053803007 | 1.05491E-48 |
| 45 | ENSG00000130775 | THEMIS2   | 3.045362221 | 2.97613E-40 |
| 46 | ENSG00000171658 |           | 3.038243171 | 1.9582E-37  |
| 47 | ENSG00000138755 | CXCL9     | 2.946997696 | 6.69733E-12 |
| 48 | ENSG00000128335 | APOL2     | 2.941400567 | 1.17379E-38 |
| 49 | ENSG00000181381 | DDX60L    | 2.936461875 | 3.03477E-32 |
| 50 | ENSG00000105939 | ZC3HAV1   | 2.934710141 | 8.96635E-76 |

**Table S2: Patients with evidence of co-infection or non-viral infection, study #1**

| Virus detected | Host mRNA signature of viral infection (Fig 2) | Organism(s) detected or clinical/radiological evidence of non-viral respiratory infection                                                          |
|----------------|------------------------------------------------|----------------------------------------------------------------------------------------------------------------------------------------------------|
| YES (CoV)      | YES                                            | COPD, fever, infected bullae on CXR. Sputum culture positive for <i>Pseudomonas aeruginosa</i> .                                                   |
| NO             | NO                                             | Neutropenia and fever, new bilateral infiltrates on CXR. Sputum culture positive for MRSA.                                                         |
| NO             | NO                                             | Left basilar infiltrate on CXR. Sepsis and respiratory failure. No sputum obtained.                                                                |
| NO             | NO                                             | COPD, RUL infiltrate on CXR. No sputum obtained.                                                                                                   |
| NO             | NO                                             | Lung transplant recipient, increased cough. Sputum culture positive for <i>Aspergillus</i> . BAL cytology revealed <i>Pneumocystis jirovecii</i> . |
| NO             | NO                                             | Left lower lobe infiltrate on CXR. History consistent with aspiration. No sputum obtained.                                                         |
| NO             | NO                                             | Cystic fibrosis, increased SOB. Sputum culture positive for <i>Pseudomonas aeruginosa</i> .                                                        |
| NO             | NO                                             | Disabled elderly patient, basilar infiltrate on CXR, presumed aspiration pneumonia. No sputum obtained.                                            |

CoV, coronavirus

COPD, chronic obstructive pulmonary disease

CXR, chest x-ray

MRSA, methicillin resistant *Staphylococcus aureus*

BAL, bronchoalveolar lavage

SOB, shortness of breath

**Fig S1. Patient characteristics, mRNA biomarker study of 68 nasopharyngeal swabs (study 1)**

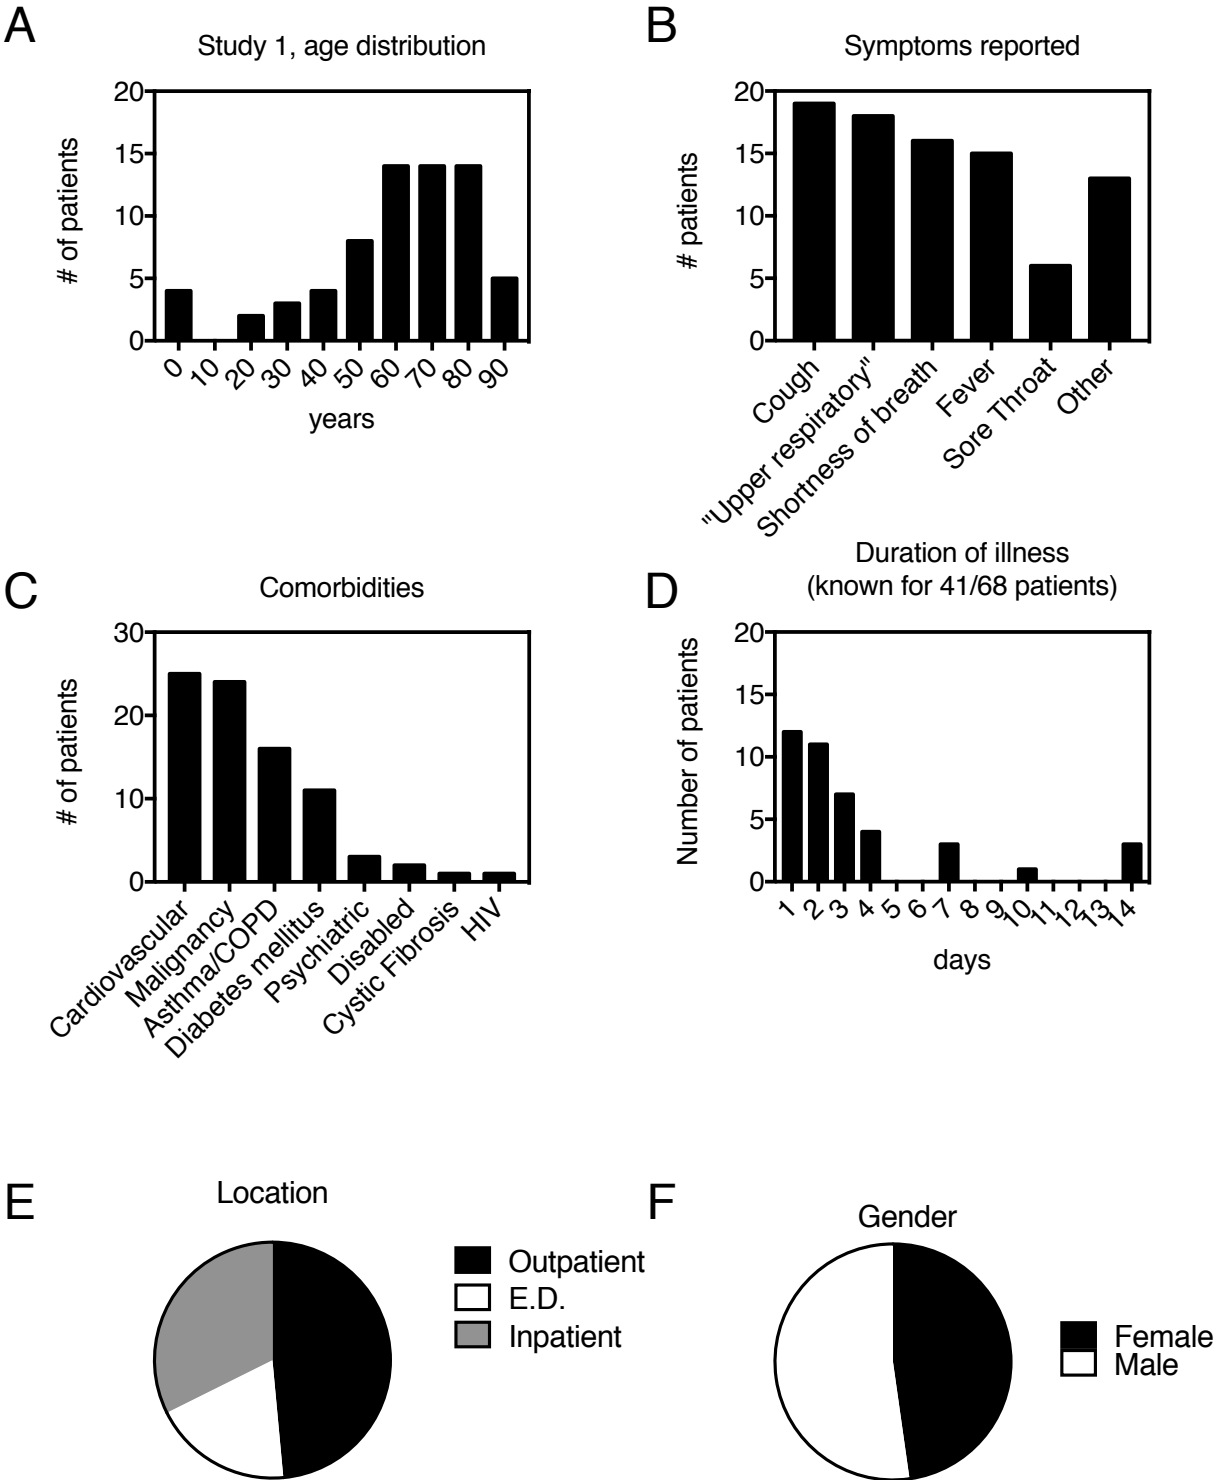

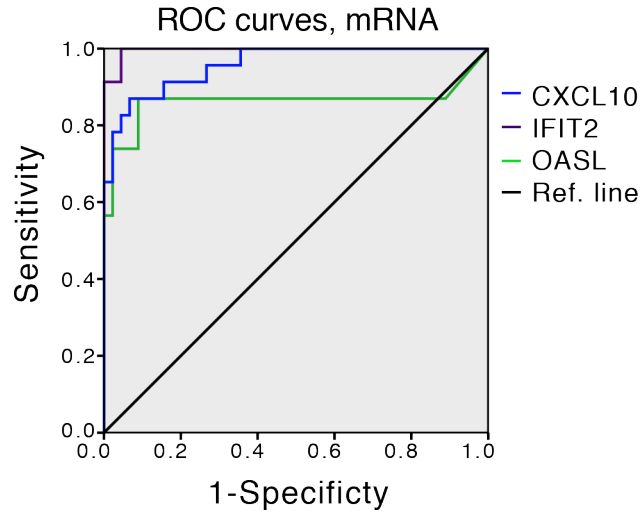

| Test Result Variable(s) | Area | Std. Error <sup>a</sup> | Asymptotic Sig. <sup>b</sup> | Asymptotic 95% Confidence Interval |             |
|-------------------------|------|-------------------------|------------------------------|------------------------------------|-------------|
|                         |      |                         |                              | Lower Bound                        | Upper Bound |
| IFIT2                   | .996 | .004                    | .000                         | .988                               | 1.000       |
| OASL                    | .861 | .066                    | .000                         | .732                               | .991        |
| CXCL10                  | .958 | .022                    | .000                         | .915                               | 1.000       |

**Fig S2. ROC curves showing predictive value of individual ISG mRNA levels for detection of a respiratory virus in 68 NP swabs (study 1; see Fig 1).** Relationship between mRNA level and presence of virus was calculated using IBM SPSS statistics. Table shows AUC with 95% confidence interval for each mRNA biomarker.

Fig S3. Patient age distribution, 151 NP swabs, study 2.

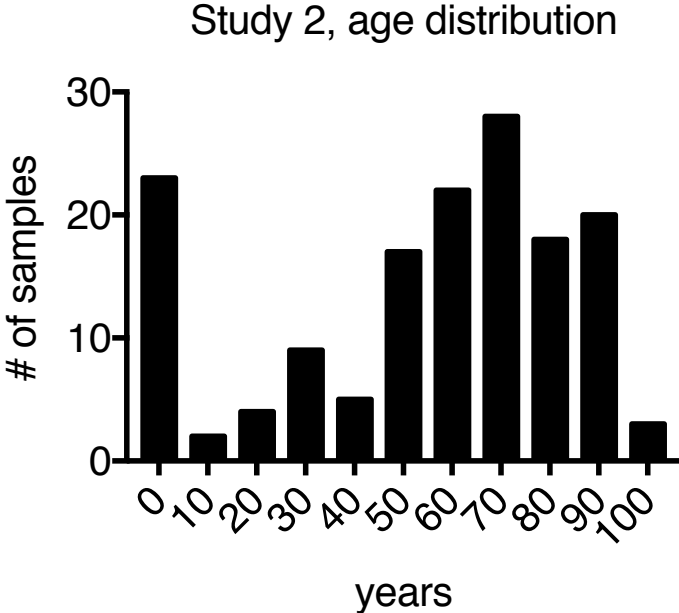

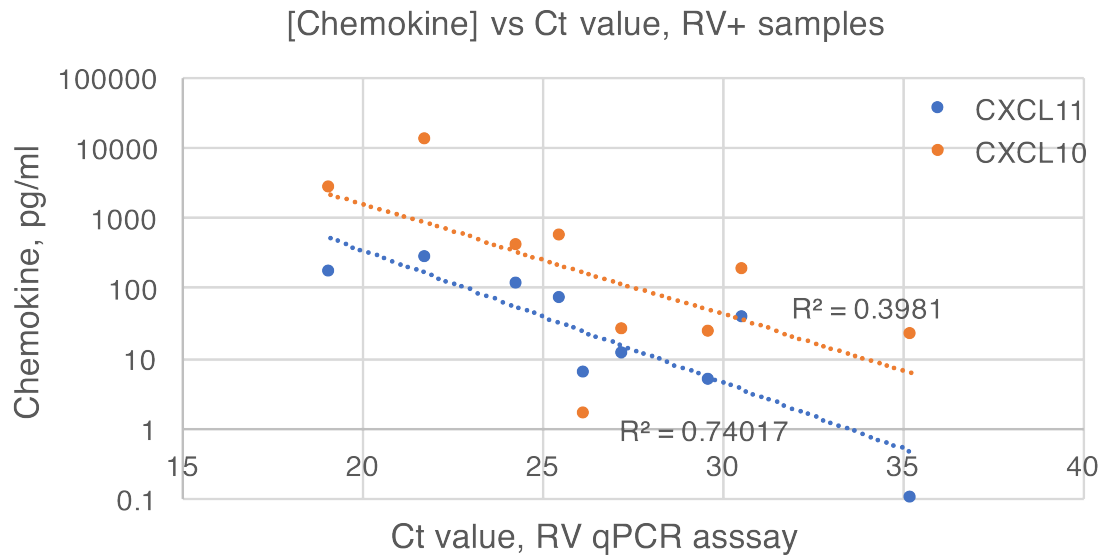

**Fig S4. Relationship between concentration of CXCL10 or CXCL11 and Ct value at which RT-qPCR for rhinovirus became positive (see Fig 4).** X-axis shows chemokine concentration and y-axis shown cycle at which RT-qPCR became positive for the 9 RV-positive samples in study 2 in which no other virus was detected. Exponential curve fit shows correlation between low Ct value (high level of virus) and high chemokine concentration. Calculations performed using Microsoft Excel.



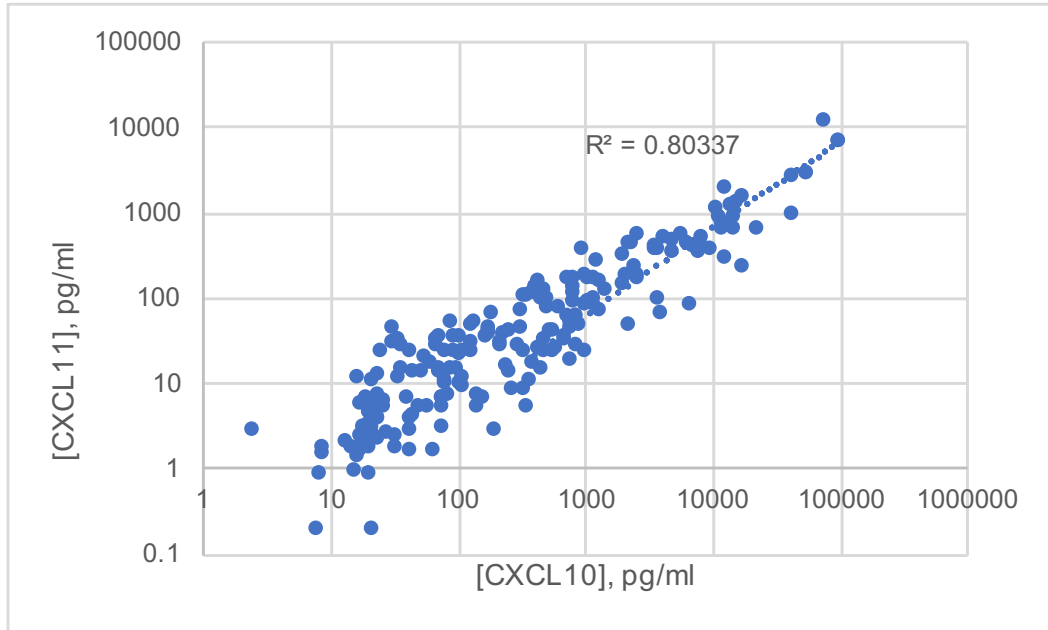

**Fig S5. Correlation between [CXCL11] and [CXCL10], 219 NP swabs.** Correlation coefficient for linear curve fit was calculated using Microsoft Excel. Axes show chemokine concentration in pg/ml; each dot represents one NP sample.

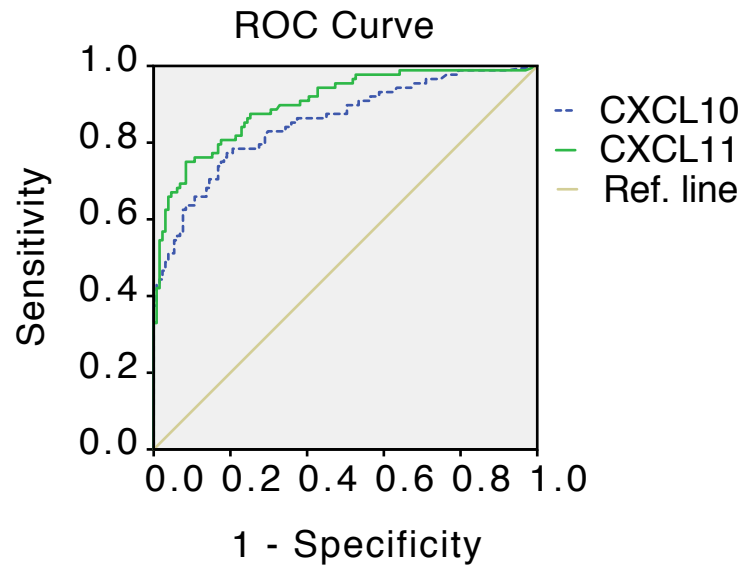

CXCL10 AUC=0.853 (95% C.I., 0.800-0.906)  
 CXCL11 AUC=0.901 (95% C.I., 0.859-0.943)

**Fig S6. ROC curves showing correlation between [CXCL11] or [CXCL10] (pg/ml) in NP swab transport medium and detection of respiratory virus in 219 NP swabs (study 1 + study 2; see Fig 5.)** Relationship between chemokine protein level and presence of virus was calculated using SPSS statistics. Table shows AUC with 95% C.I. for each protein.
